# Supplementary material
Source: PubMed Central journal article supplement (PMC7925350)
Supplement: NIHMS1648541-supplement-1.pdf [file NIHMS1648541-supplement-1.pdf]

## Supp Figure 1: Validation of mitogenic stimulation by growth factor treatment.

**Methods.** To assess whether growth factor treatment during explant culture results in greater subsequent S phase entry, a distinct set of cells from three donors were treated with 1  $\mu$ M EdU (5-ethynyl-2'-deoxyuridine, Click-iT™ EdU, Thermo Fisher Scientific C10338) at each feed for the duration of monolayer culture. Visualization of integrated EdU was obtained by imaging the companion Alexa Fluor™ 555 with an EVOS M5000 imaging system (Thermo Fisher Scientific) and the percentage of positive cells was quantified across 5 randomly selected images per condition per donor using ImageJ imaging software (Fiji).

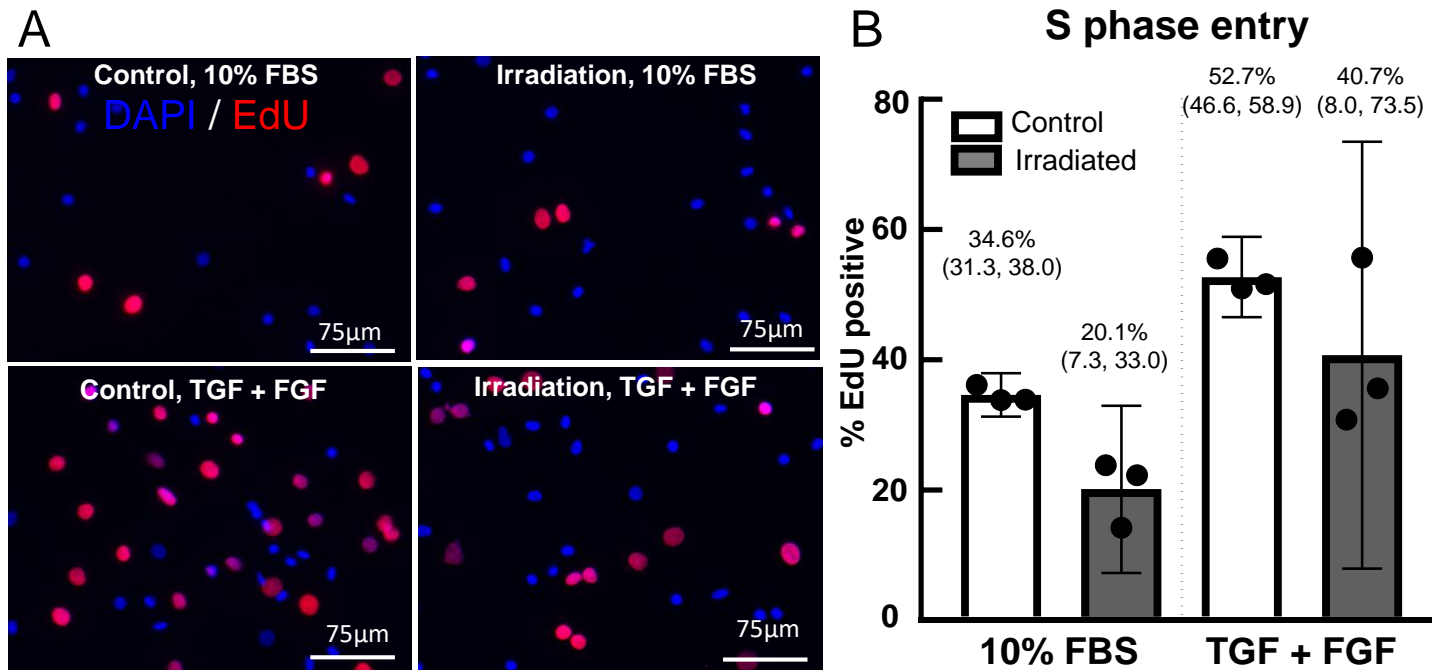

**Fig. S1.** EdU incorporation during subsequent monolayer culture in response to the growth factors TGF- $\beta$ 1 and bFGF (during explant culture only). (A) EdU by AF555 at the end of monolayer culture. (B) Percentage of cells with positive signal for EdU. The main effects of irradiation ( $p < 0.01$ ) and growth factors ( $p < 0.05$ ) provided a significant source of variation by two-way ANOVA ( $n = 3$ ).

## Supp Figure 2: Validation of SA- $\beta$ -Gal flow cytometry readout

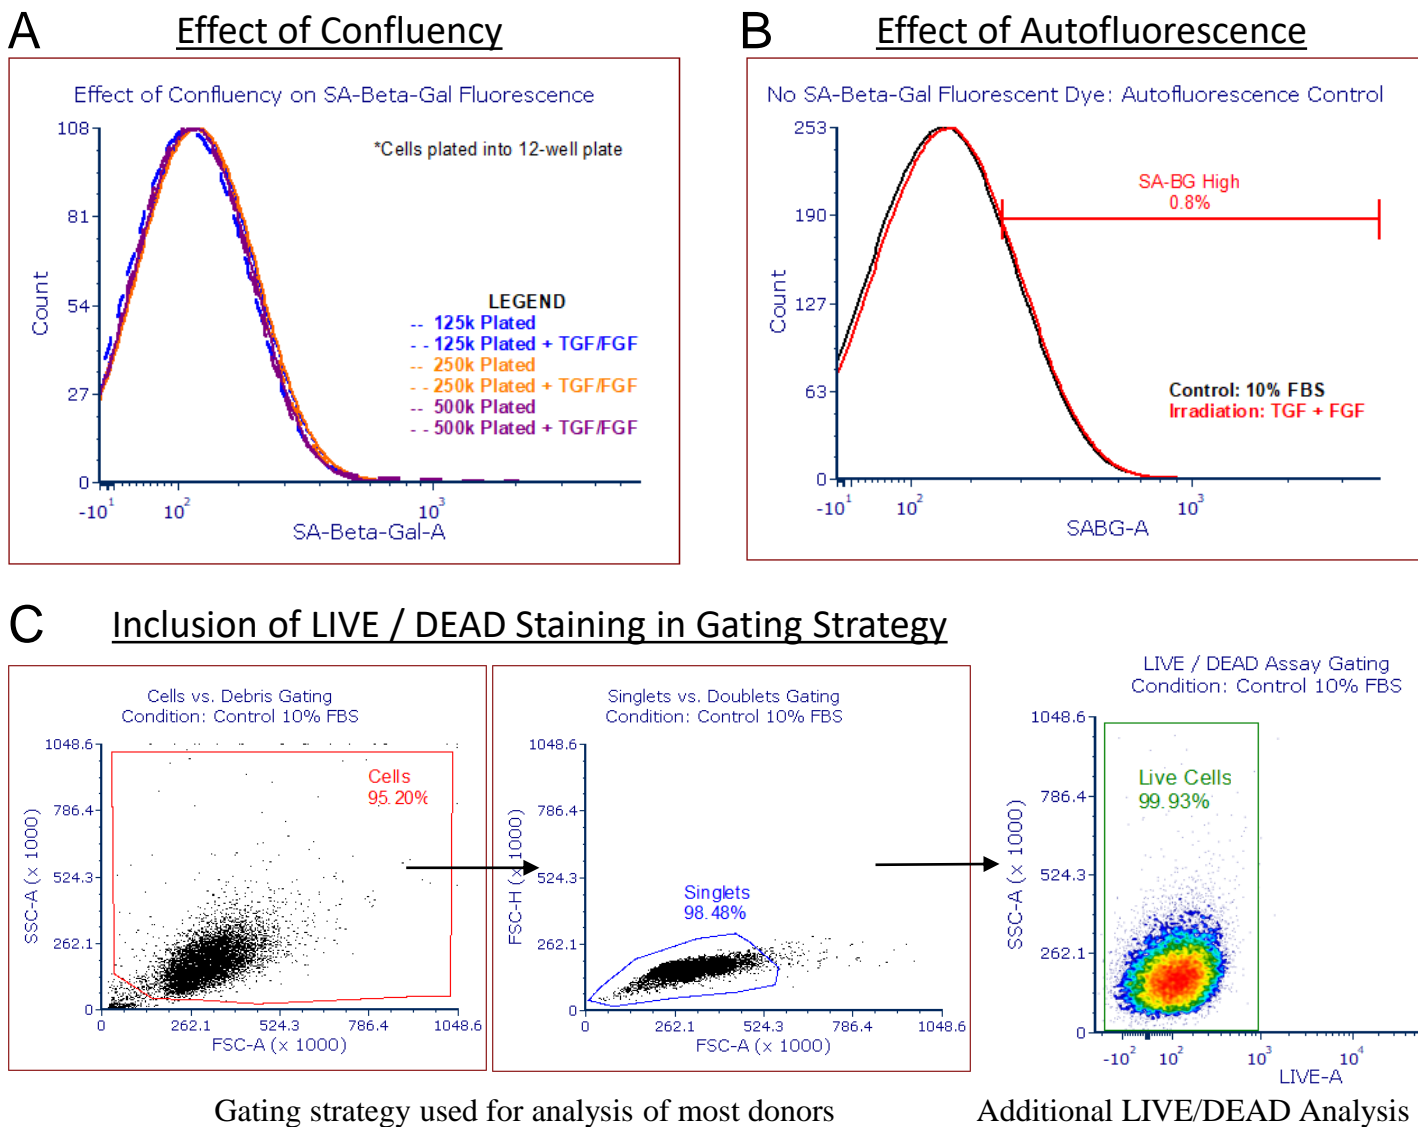

**Fig. S2.** (A) Differing confluency and cell morphology was achieved through 3 plating densities with and without growth factors (B) Autofluorescence was tested by leaving out the fluorescent SA- $\beta$ -gal substrate. Senescent cells (Irradiation plus growth factors) were compared the control 10% group. In this experiment, 0.8% of cells from the IR with TGF/FGF would have been deemed as SA- $\beta$ -gal high based on autofluorescence alone. (C) The default gating strategy did not use an explicit live/dead cell discriminator, but applying a fixable live/dead analysis (Thermo Fisher Scientific, L34962) showed that in this case 99.93% of cells reaching analysis are live.

### Supp Figure 3: Acute DNA damage after irradiation

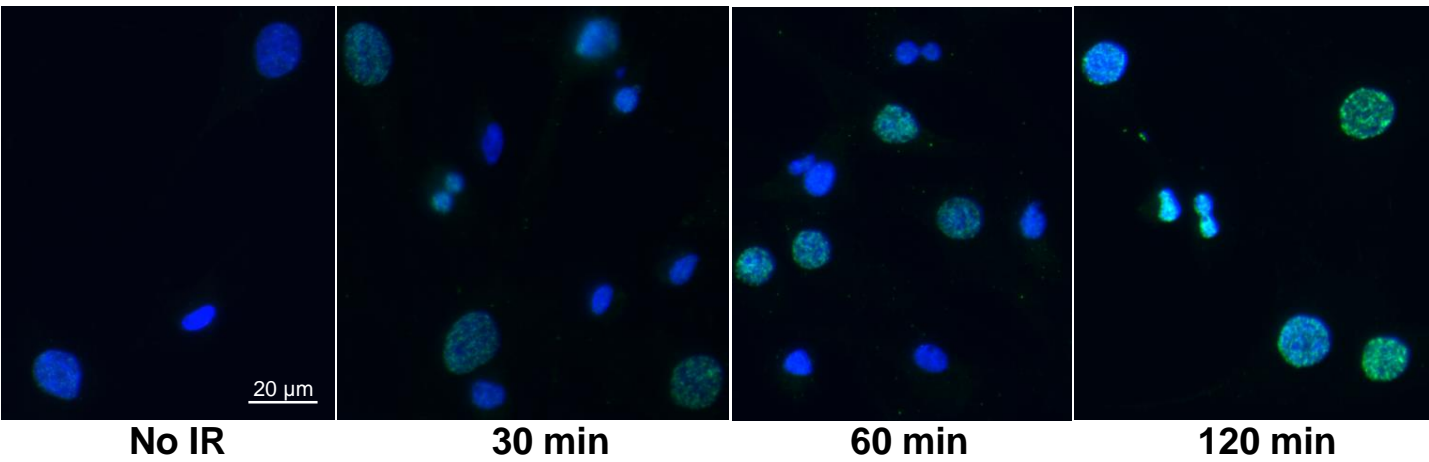

**Fig. S3.** Primary human chondrocytes in monolayer culture were treated with 10 Gy irradiation to initiate DNA damage. At 30, 60, and 120 minutes after irradiation (or a no irradiation control), individual wells were fixed and analyzed by immunofluorescence for  $\gamma$ H2AX. The appearance of foci throughout the nucleus indicates a robust DNA damage response.
